# Supplementary material for: What are the effects of environmental factors on Co speciation at the magnetite surface?
Source: Royal Society of Chemistry journal article supplement (doi:10.1039/d3en00962a), 2024-01-01
Supplement: d3en00962a1.pdf [file d3en00962a1.pdf]

## Supporting information

### What are the effects of environmental factors on Co speciation at magnetite surface?

Laura Fablet<sup>1,2</sup>, Fadi Choueikani<sup>2</sup>, Mathieu Pédrot<sup>1</sup>, and Rémi Marsac<sup>1,3\*</sup>

<sup>1</sup> Univ Rennes, CNRS, Géosciences Rennes – UMR 6118, F-35000 Rennes, France

<sup>2</sup> Synchrotron SOLEIL, l'Orme des Merisiers, Départementale 128, 91190 Saint-Aubin, France

<sup>3</sup> Université Paris Cité, Institut de physique du globe de Paris, CNRS, F-75005 Paris, France

(\*corresponding author: remi.marsac@cnrs.fr)

**The supporting information section contains 15 pages, 3 references, 12 figures and 2 tables.**

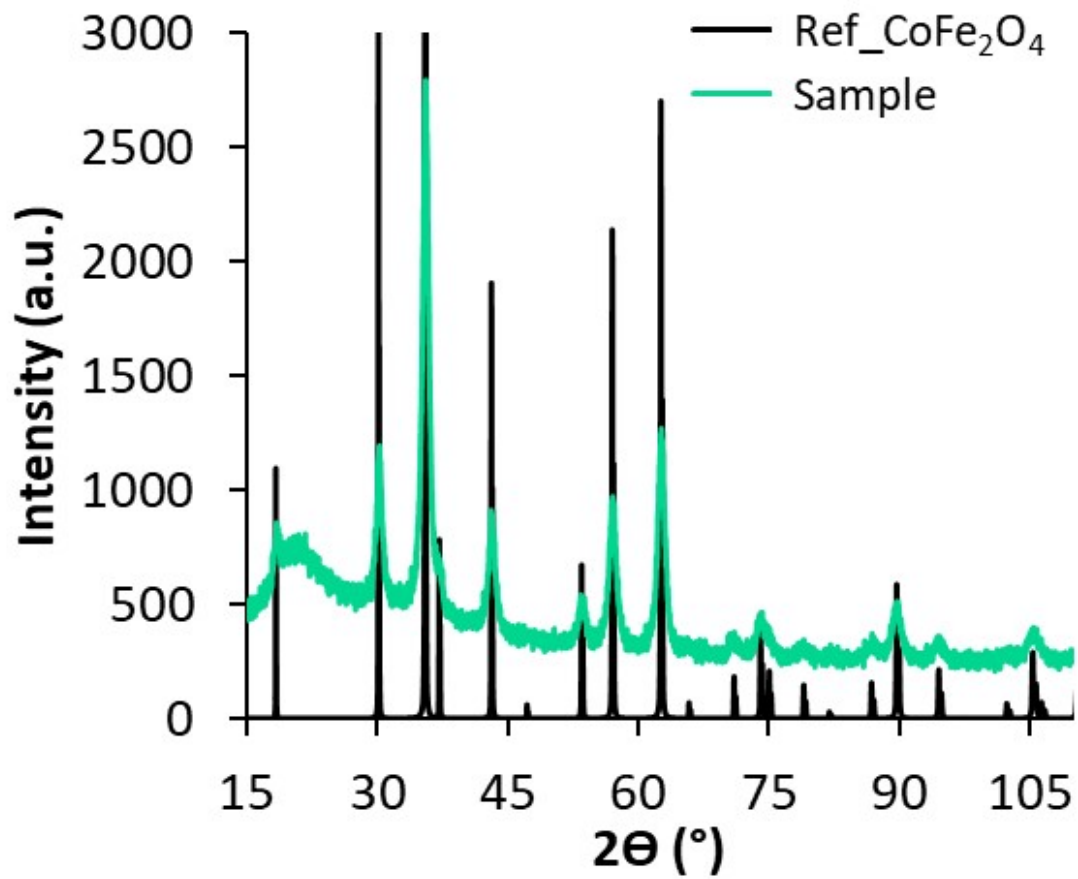

*Fig. S1* X-ray diffraction (XRD) pattern of the CoFe<sub>2</sub>O<sub>4</sub> sample (green), and theoretical pattern of CoFe<sub>2</sub>O<sub>4</sub> (black).

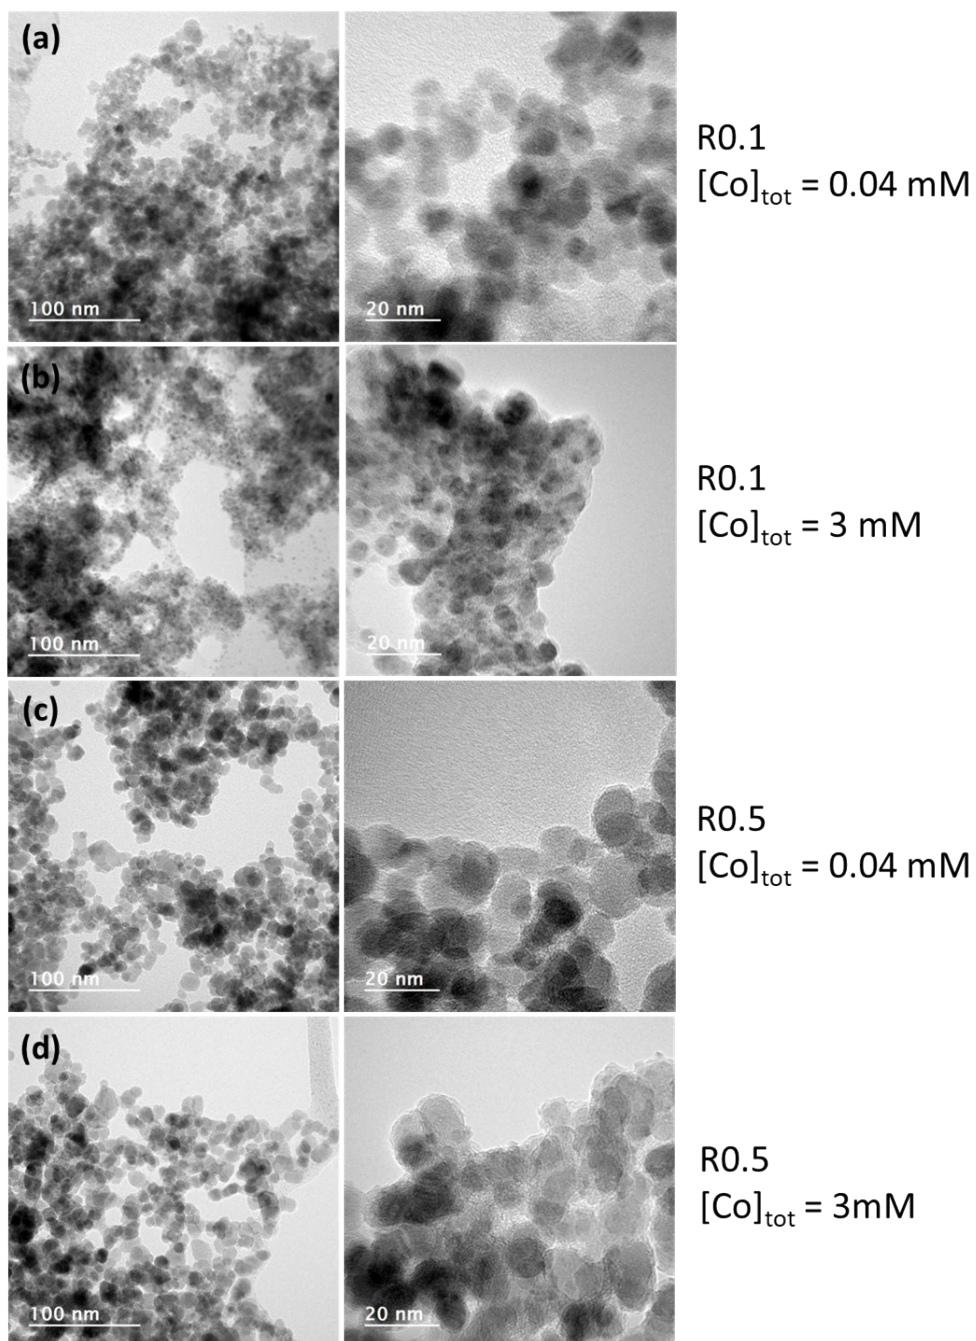

**Fig. S2** TEM images of nanoparticles with (a) magnetite R0.1 and [Co]<sub>tot</sub> = 0.04 mM ([Co]<sub>s</sub> = 0.5 atom nm<sup>-2</sup>), (b) R0.1 and [Co]<sub>tot</sub> = 3 mM ([Co]<sub>s</sub> = 18.9 atom nm<sup>-2</sup>), (c) R0.5 and [Co]<sub>tot</sub> = 0.04 mM ([Co]<sub>s</sub> = 0.5 atom nm<sup>-2</sup>), (d) R0.5 and [Co]<sub>tot</sub> = 3 mM ([Co]<sub>s</sub> = 25.7 atom nm<sup>-2</sup>). (Left) scale of 100 nm and (Right) scale of 20 nm.

**Table S1** Corresponding total ([Co]<sub>tot</sub>), aqueous ([Co]<sub>aq</sub>) and solid ([Co]<sub>s</sub>) concentration cobalt for R0.1 and R0.3. Data of R0.5 from Fablet *et al.*, 2023 are included for comparison.<sup>1</sup>

| [Co] <sub>tot</sub> (mM) | [Co] <sub>aq</sub> (mM) |                    |                    | [Co] <sub>s</sub> (mM) |       |       | [Co] <sub>s</sub> (atom nm <sup>-2</sup> ) |        |        |
|--------------------------|-------------------------|--------------------|--------------------|------------------------|-------|-------|--------------------------------------------|--------|--------|
|                          | R0.1                    | R0.3               | R0.5               | R0.1                   | R0.3  | R0.5  | R0.1                                       | R0.3   | R0.5   |
| 0.003                    | 3x10 <sup>-6</sup>      | 4x10 <sup>-6</sup> | 2x10 <sup>-6</sup> | 0.003                  | 0.003 | 0.003 | 0.036                                      | 0.036  | 0.036  |
| 0.005                    | 7x10 <sup>-6</sup>      | 1x10 <sup>-5</sup> | 3x10 <sup>-6</sup> | 0.005                  | 0.005 | 0.005 | 0.060                                      | 0.060  | 0.060  |
| 0.01                     | 2x10 <sup>-5</sup>      | 4x10 <sup>-5</sup> | 6x10 <sup>-6</sup> | 0.010                  | 0.010 | 0.010 | 0.121                                      | 0.119  | 0.120  |
| 0.02                     | 5x10 <sup>-5</sup>      | 8x10 <sup>-5</sup> | 5x10 <sup>-5</sup> | 0.020                  | 0.020 | 0.020 | 0.244                                      | 0.239  | 0.240  |
| 0.04                     | 1x10 <sup>-4</sup>      | 6x10 <sup>-4</sup> | 2x10 <sup>-4</sup> | 0.040                  | 0.039 | 0.040 | 0.497                                      | 0.471  | 0.478  |
| 0.08                     | 0.005                   | 0.003              |                    | 0.078                  | 0.075 |       | 1.022                                      | 0.899  |        |
| 0.1                      | 0.009                   | 0.02               | 0.001              | 0.090                  | 0.08  | 0.01  | 1.087                                      | 0.960  | 1.190  |
| 0.16                     | 0.015                   | 0.002              | 0.002              | 0.141                  | 0.155 | 0.013 | 1.696                                      | 1.868  | 1.904  |
| 0.2                      | 0.029                   | 0.005              | 0.153              | 0.168                  | 0.193 | 0.185 | 2.022                                      | 2.327  | 2.224  |
| 0.32                     | 0.063                   | 0.012              | 0.017              | 0.252                  | 0.298 | 0.303 | 3.041                                      | 3.589  | 3.646  |
| 0.4                      | 0.057                   | 0.102              |                    | 0.341                  | 0.296 |       | 4.106                                      | 3.560  |        |
| 0.48                     | 0.144                   |                    |                    | 0.331                  |       |       | 3.985                                      |        |        |
| 0.64                     | 0.274                   |                    | 0.052              | 0.359                  |       | 0.588 | 4.319                                      |        | 7.084  |
| 0.8                      | 0.434                   | 0.132              | 0.110              | 0.346                  | 0.654 | 0.689 | 4.162                                      | 7.876  | 8.304  |
| 0.94                     | 0.561                   | 0.250              |                    | 0.383                  | 0.695 |       | 4.617                                      | 8.373  |        |
| 1.12                     | 0.629                   |                    |                    | 0.476                  |       |       | 5.734                                      |        |        |
| 1.26                     | 0.744                   | 0.320              | 0.367              | 0.513                  | 0.938 | 0.913 | 6.182                                      | 11.299 | 11.000 |
| 1.42                     | 0.861                   | 0.391              |                    | 0.557                  | 1.043 |       | 6.706                                      | 12.571 |        |
| 1.6                      |                         | 0.500              |                    |                        | 1.097 |       |                                            | 13.216 |        |
| 1.74                     | 0.914                   | 0.568              |                    | 0.821                  | 1.175 |       | 9.887                                      | 14.155 |        |
| 1.92                     |                         | 0.613              |                    |                        | 1.298 |       |                                            | 15.631 |        |
| 2.04                     |                         | 0.694              |                    |                        | 1.350 |       |                                            | 16.262 |        |
| 2.24                     |                         | 0.689              |                    |                        | 1.549 |       |                                            | 18.658 |        |
| 2.4                      | 1.220                   | 0.747              |                    | 1.255                  | 1.647 |       | 15.116                                     | 19.842 |        |
| 2.56                     |                         | 0.779              | 0.740              |                        | 1.781 | 1.820 |                                            | 21.455 | 21.915 |
| 2.67                     |                         | 0.850              |                    |                        | 1.819 |       |                                            | 21.911 |        |
| 2.78                     | 1.269                   | 0.9066             |                    | 1.468                  | 1.873 |       | 17.677                                     | 22.564 |        |
| 2.89                     | 1.273                   | 0.920              |                    | 1.851                  | 1.969 |       | 19.039                                     | 23.714 |        |
| 3                        | 1.384                   | 1.034              | 0.863              | 1.570                  | 1.963 | 2.137 | 18.914                                     | 23.638 | 25.735 |

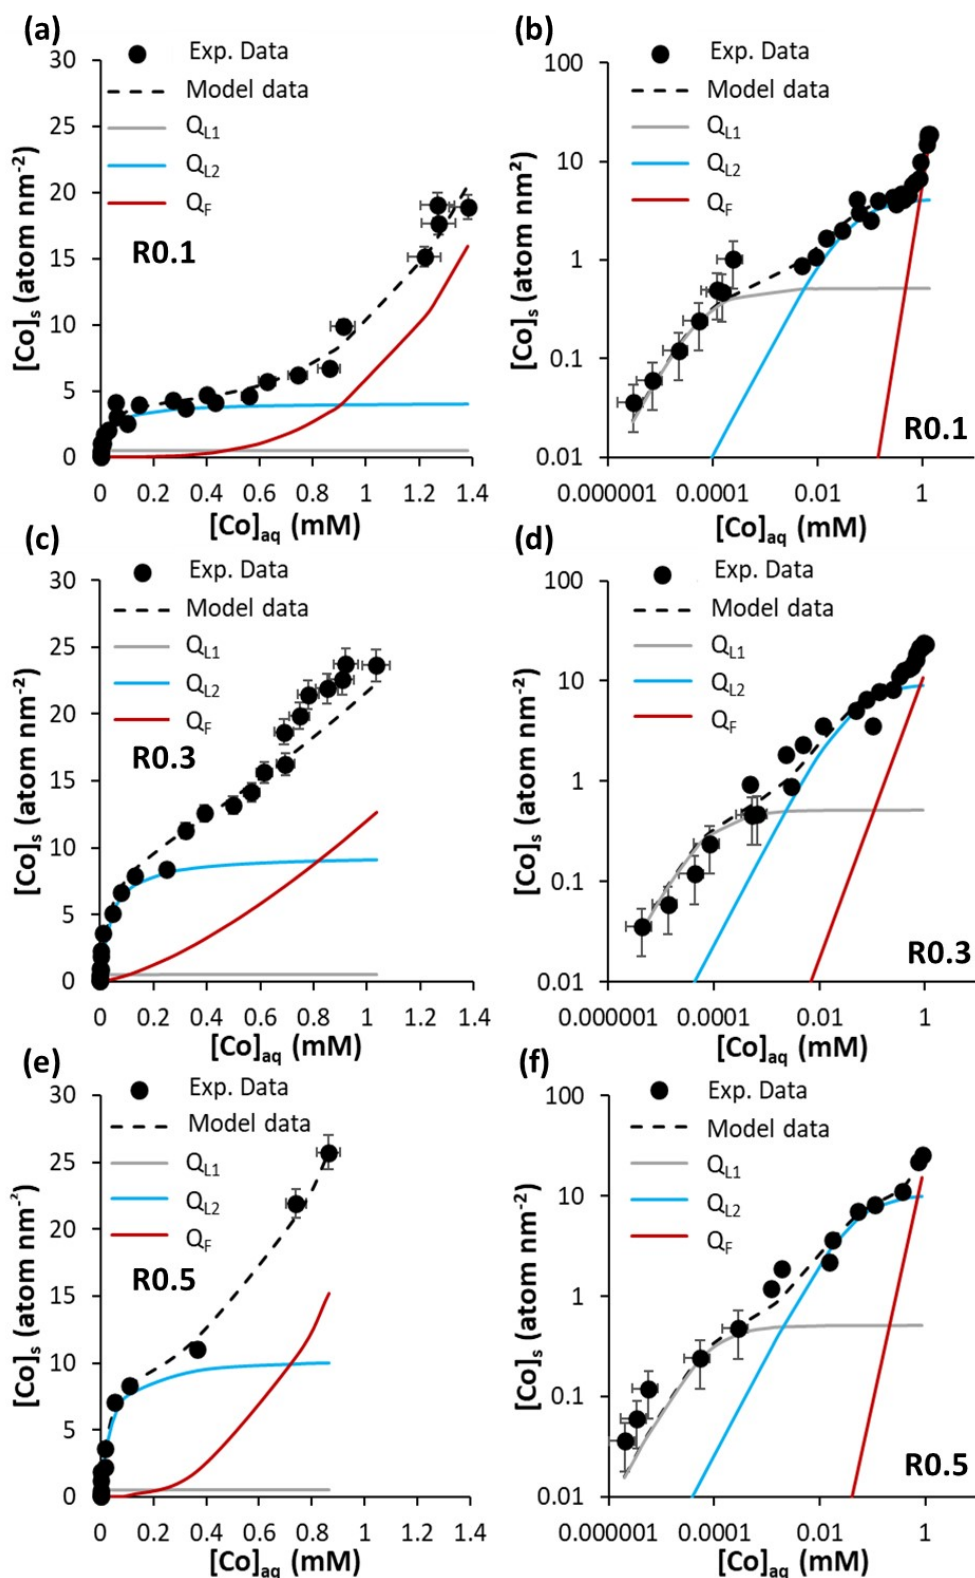

**Fig. S3** Cobalt adsorption isotherms at different stoichiometries : R0.1 (a,b), R0.3 (c,d) and R0.5 (e,f) (data of R0.5 from Fablet et al., 2023)<sup>1</sup> presented either as linear (a,c,e) and logarithmic scale (b,d,f) at pH 8 in 10 mM NaCl solution. Dashed black lines are model results using a combination of two Langmuir ( $Q_{L1}$  and  $Q_{L2}$  as grey and blue lines, respectively) and one Freundlich isotherm equations ( $Q_F$ , red lines). Analytical error bars of 5% are plotted, although not visible for some data and at logarithmic scale. Error was set to 50% for data with  $[Co]_{aq} < 0.001$  mM on the logarithmic scale (i.e.  $\pm 0.2$  log unit)<sup>2</sup> to acknowledge the fact that larger error may be encountered at low concentrations.

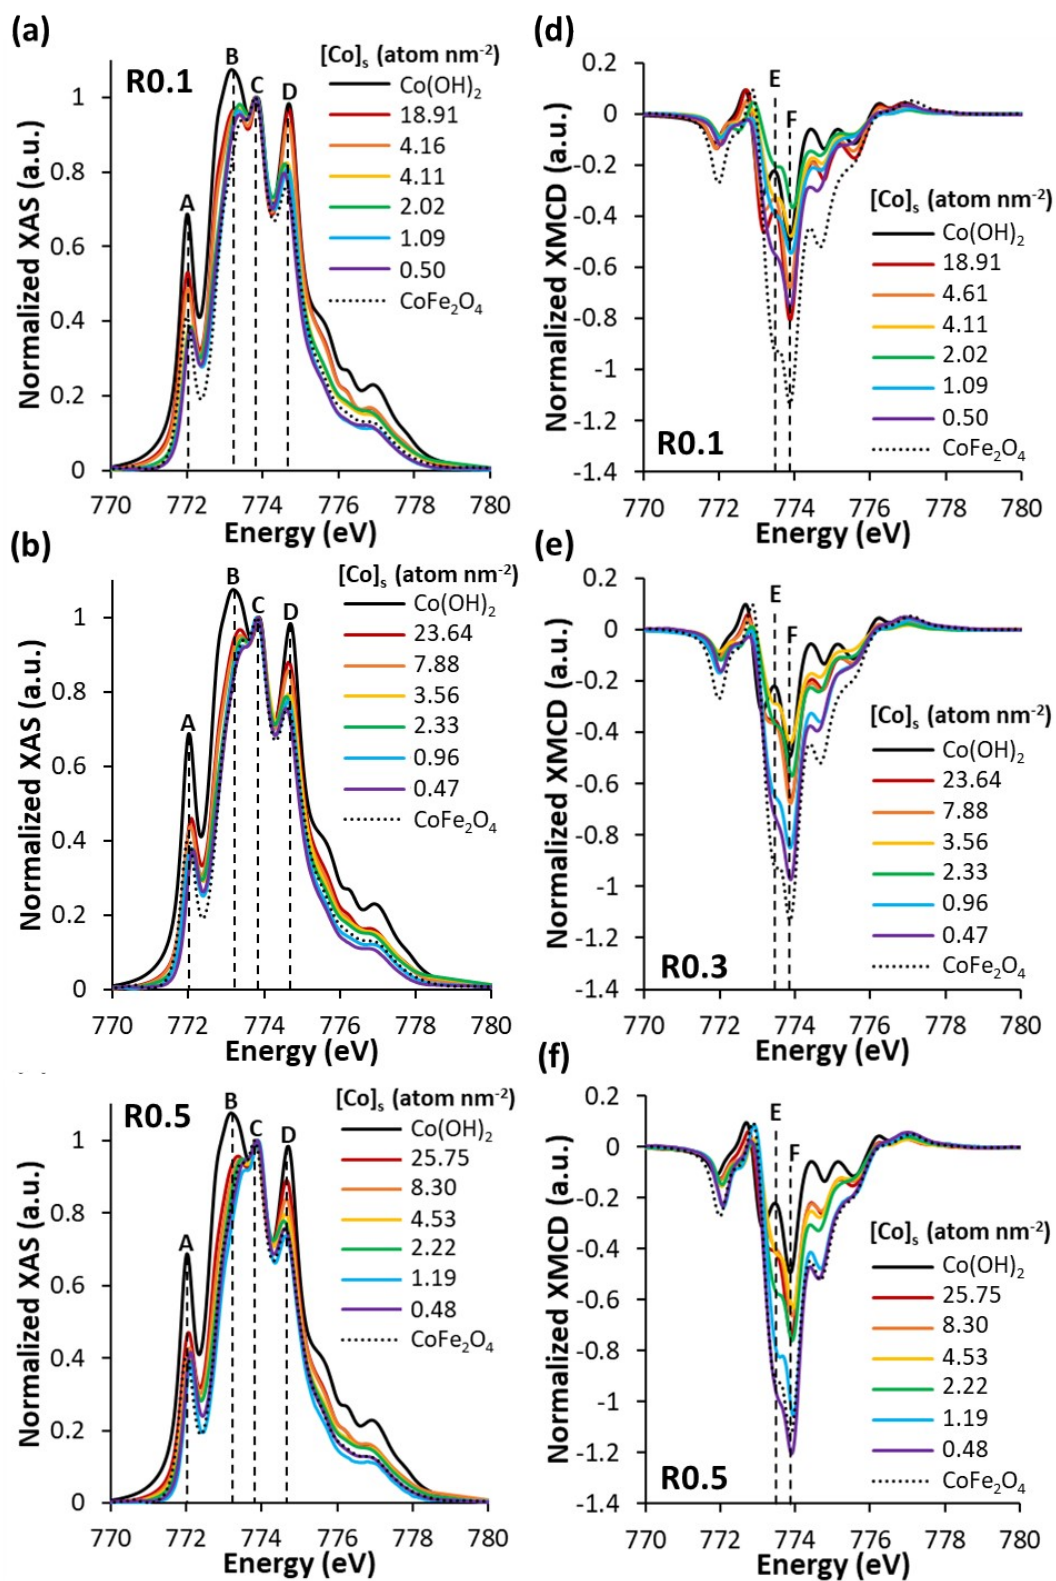

**Fig. S4** Normalized XAS of (a) R0.1, (b) R0.3 and (c) R0.5, and XMCD for (d) R0.1, (e) R0.3 and (f) R0.5 spectra at the Co L<sub>3</sub>-edge, with different solid Co concentrations ( $0.48 \leq [Co]_{tot} \leq 25.74$  atom nm<sup>-2</sup>) and two references: CoFe<sub>2</sub>O<sub>4</sub> (dotted line) and Co(OH)<sub>2</sub> (full black line). XAS and XMCD signals are normalized by dividing the raw signal by the edge jump of XAS, and XAS spectra are also normalized to the C peak. Data of R0.5 from Fablet et al. (2023).<sup>1</sup>

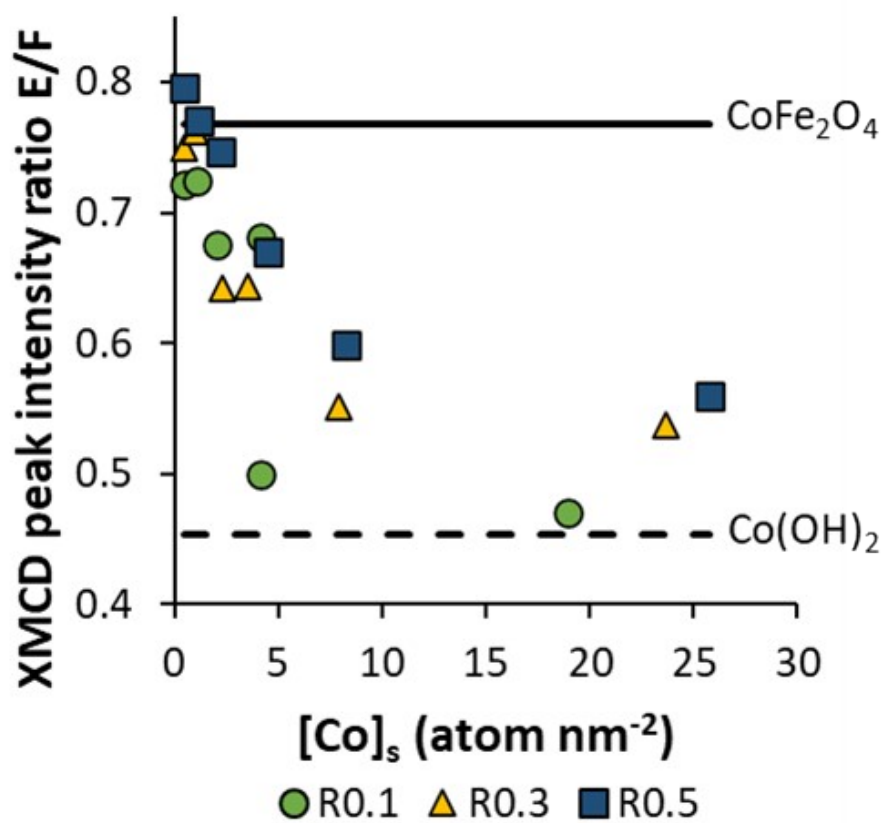

**Fig. S5** XMCD intensity ratio of E and F peaks, as a function of  $[Co]_s$  (atom nm<sup>-2</sup>) for R0.1 (green circles), R0.3 (yellow triangles), R0.5 (blue squares). The dashed line corresponds to the XMCD intensity of Co(OH)<sub>2(s)</sub> and the solid line to CoFe<sub>2</sub>O<sub>4</sub> references. Data of R0.5 from Fablet et al. (2023).<sup>1</sup>

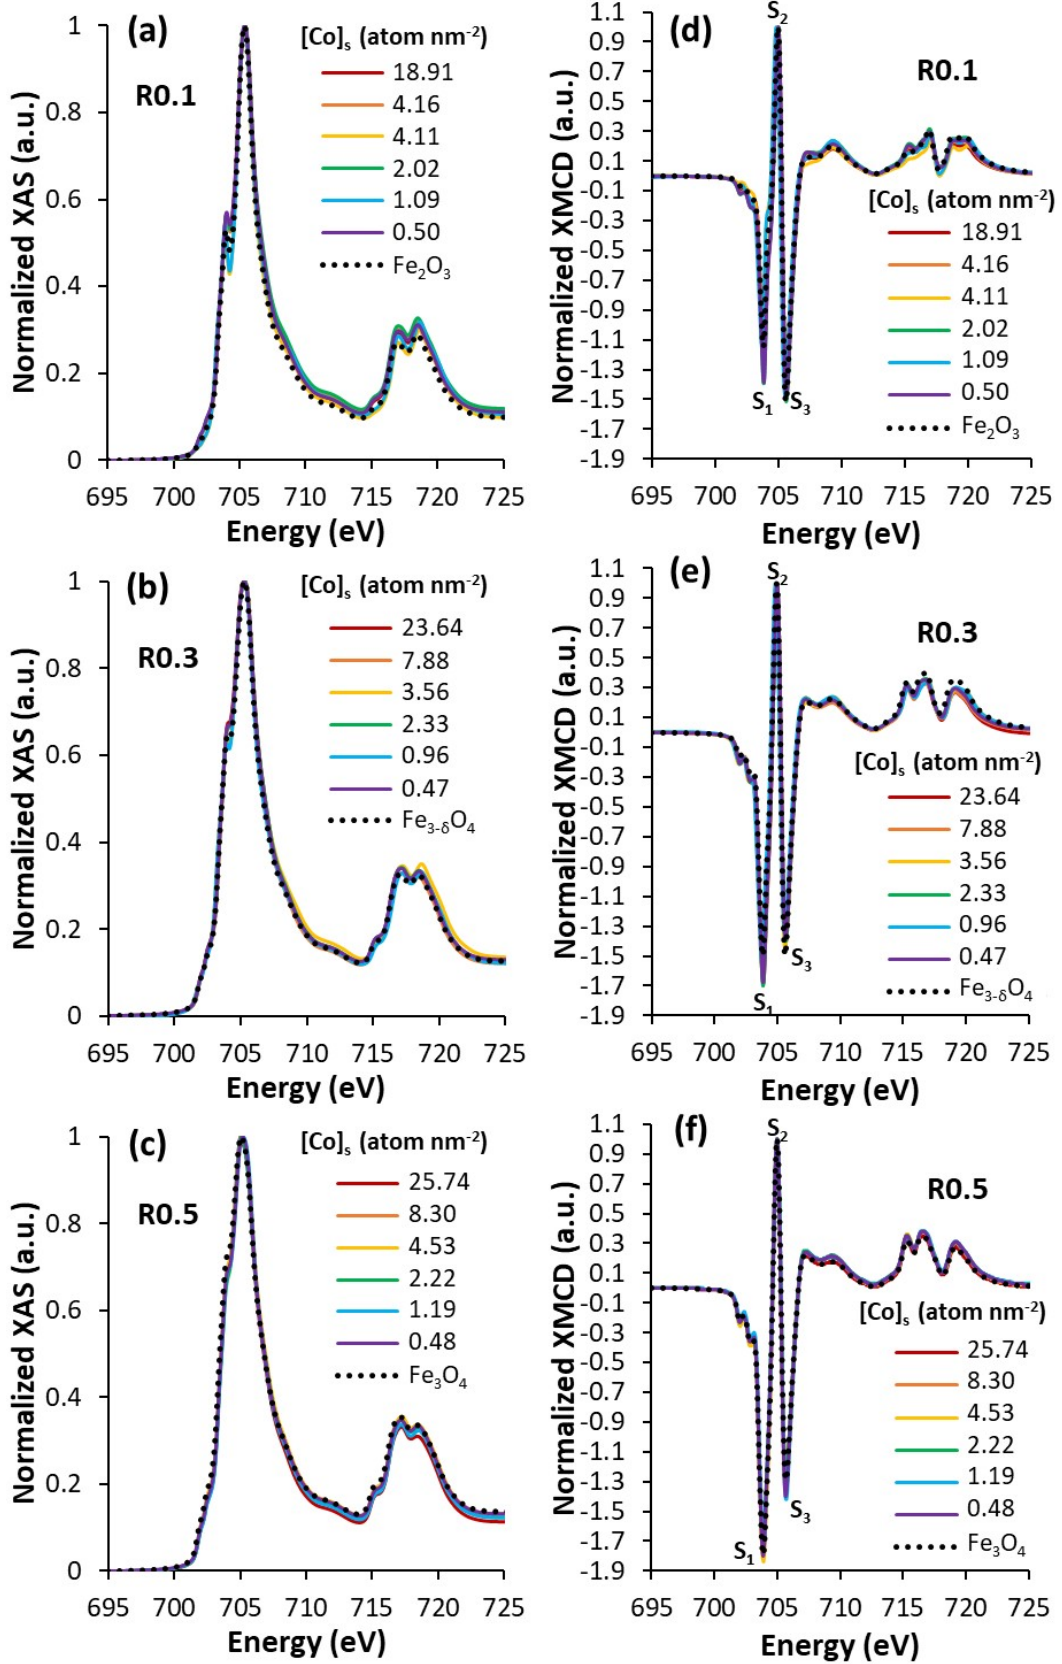

**Fig. S6** Normalized XAS spectra for (a) R0.1, (b) R0.3 and (c) R0.5 magnetites (from Fablet et al., 2023),<sup>1</sup> and normalized XMCD spectra for (d) R0.1, (e) R0.3 and (f) R0.5 magnetites, at the Fe  $L_{2,3}$ -edge, with different total Co concentrations ( $0.48 \leq [\text{Co}]_{\text{tot}} \leq 25.74$  atom  $\text{nm}^{-2}$ ) and three references: maghemite ( $\text{Fe}_2\text{O}_3$ ), non-stoichiometric magnetite ( $\text{Fe}_{3-\delta}\text{O}_4$ ) and stoichiometric magnetite ( $\text{Fe}_3\text{O}_4$ ), represented by dotted line (data from Jungchaoren et al., 2021).<sup>3</sup> XAS signals are normalized by dividing the raw signal by the edge jump of XAS. XMCD signal was normalized to the  $\text{Fe}^{3+}_{(\text{Td})}$  peak (positive one).



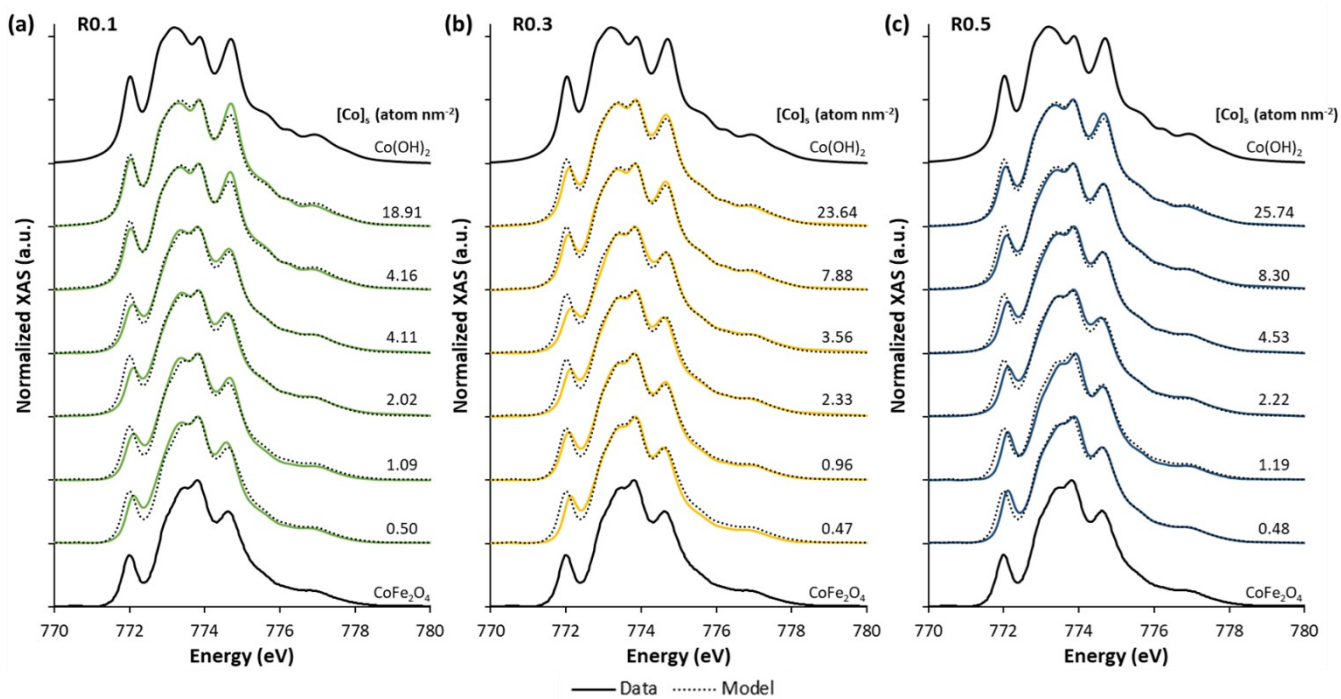

**Fig. S7** Fits of linear combination analysis of normalized XAS spectra at Co  $L_3$  edge for different  $[\text{Co}]_s$ , with (a) R0.1, (b) R0.3 and (c) R0.5 magnetite, using  $\text{Co(OH)}_2$  and  $\text{CoFe}_2\text{O}_4$  references. Data are represented by a solid line and models by a dotted line.

**Table S2** Results of the chi-squares test ( $\chi^2$ ) on the fits of linear combination analysis.

| Stoichiometry | [Co] <sub>s</sub> (atom nm <sup>-2</sup> ) | $\chi^2$ |
|---------------|--------------------------------------------|----------|
| R0.1          | 0.50                                       | 0.015    |
|               | 1.09                                       | 0.004    |
|               | 2.02                                       | 0.004    |
|               | 4.11                                       | 0.003    |
|               | 4.16                                       | 0.001    |
|               | 18.91                                      | 0.001    |
| R0.3          | 0.47                                       | 0.011    |
|               | 0.96                                       | 0.003    |
|               | 2.33                                       | 0.006    |
|               | 3.56                                       | 0.006    |
|               | 7.88                                       | 0.002    |
|               | 23.64                                      | 0.002    |
| R0.5          | 0.48                                       | 0.003    |
|               | 1.19                                       | 0.017    |
|               | 2.22                                       | 0.004    |
|               | 4.53                                       | 0.003    |
|               | 8.30                                       | 0.003    |
|               | 25.74                                      | 0.002    |

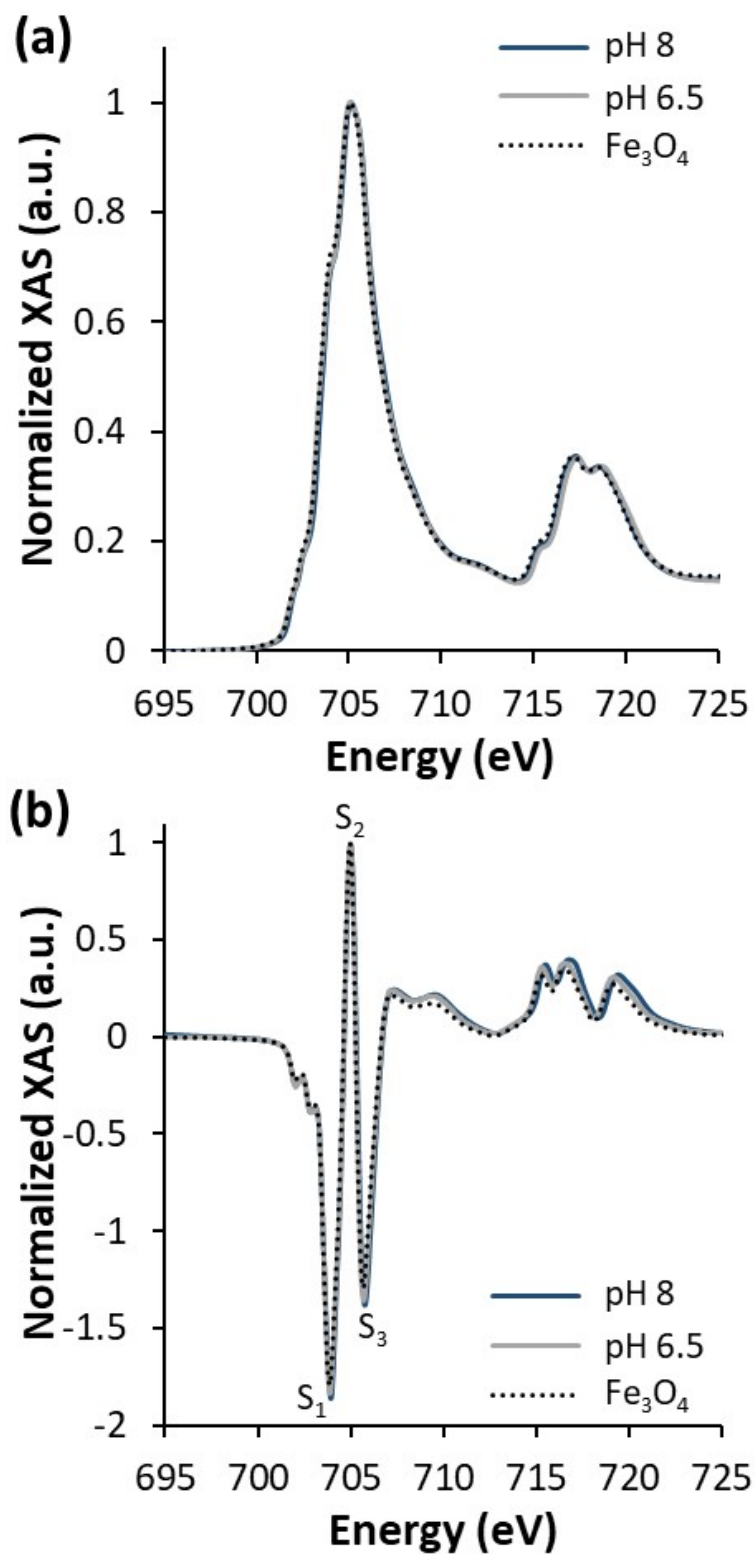

**Fig. S8** Normalized (a) XAS and (b) XMCD spectra at the Fe  $L_{2,3}$ -edge at pH 6.5 (gray line) and pH 8 (blue line) for  $[Co]_{tot} = 0.4$  mM, for stoichiometric magnetite (R0.5). The dotted line corresponds to the XAS of  $Fe_3O_4$  (data from Jungchaoren et al., 2021). XAS signals are normalized by dividing the raw signal by the edge jump of XAS. XMCD signals are normalized to the  $Fe^{3+}_{(Td)}$  peak (positive one).

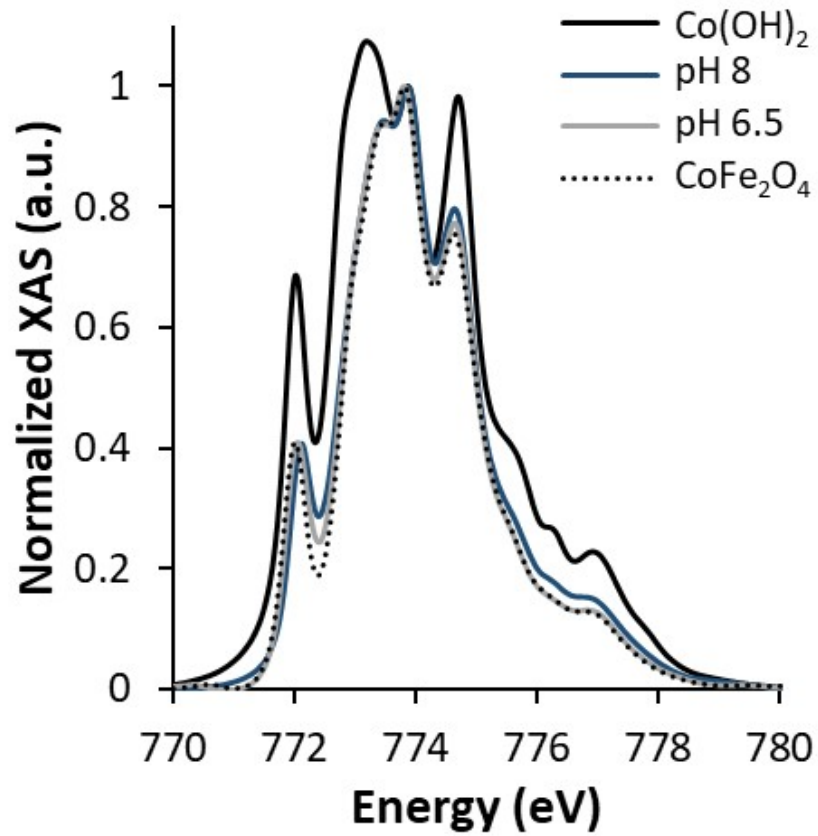

**Fig. S9** Normalized XAS spectra at the Co  $L_3$ -edge at pH 6.5 (gray line) and pH 8 (blue line) for  $[Co]_{tot} = 0.4$  mM, for stoichiometric magnetite (R0.5). The dotted line corresponds to the XAS of  $CoFe_2O_4$  and the solid line  $Co(OH)_2$  references. XAS signals are normalized by dividing the raw signal by the maximum XAS peak and also normalized to the C peak

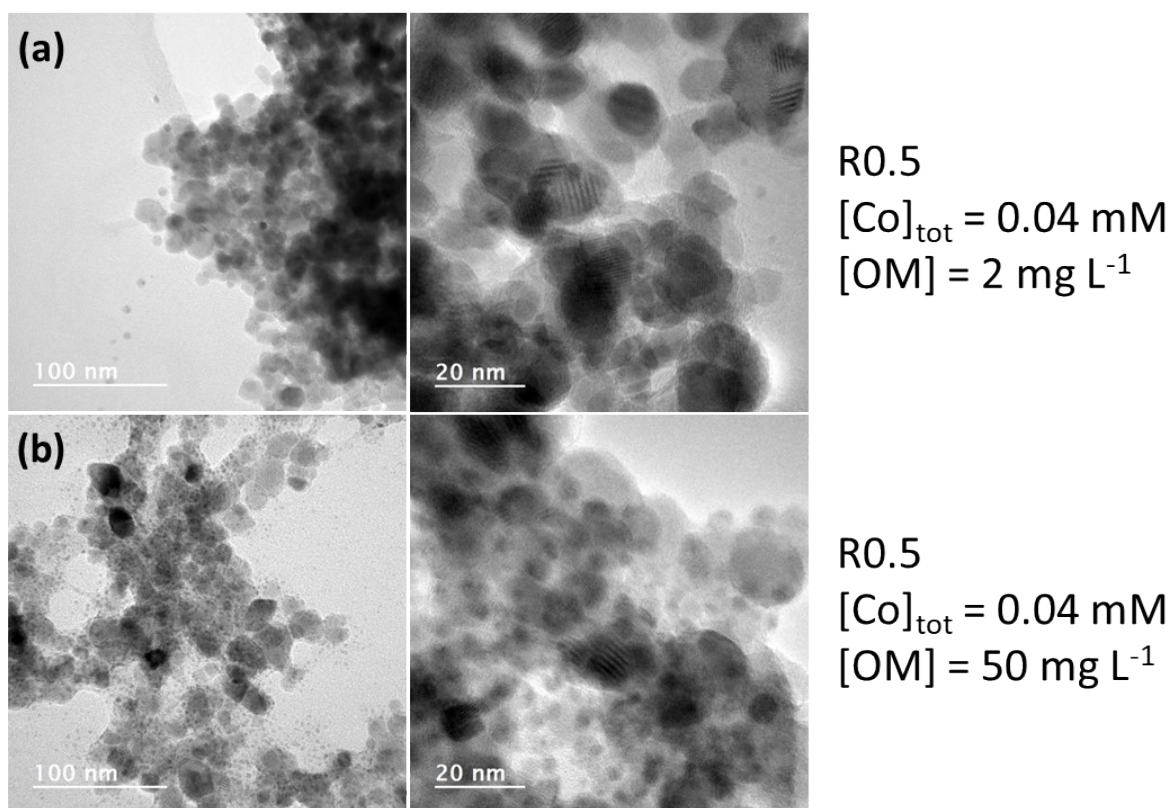

**Fig. S10** TEM images of stoichiometric magnetite with (a)  $[OM] = 2 \text{ mg L}^{-1}$  and (b)  $[OM] = 50 \text{ mg L}^{-1}$  and  $[Co]_{tot} = 0.04 \text{ mM}$ . (Left) scale of 100 nm and (right) 20 nm.

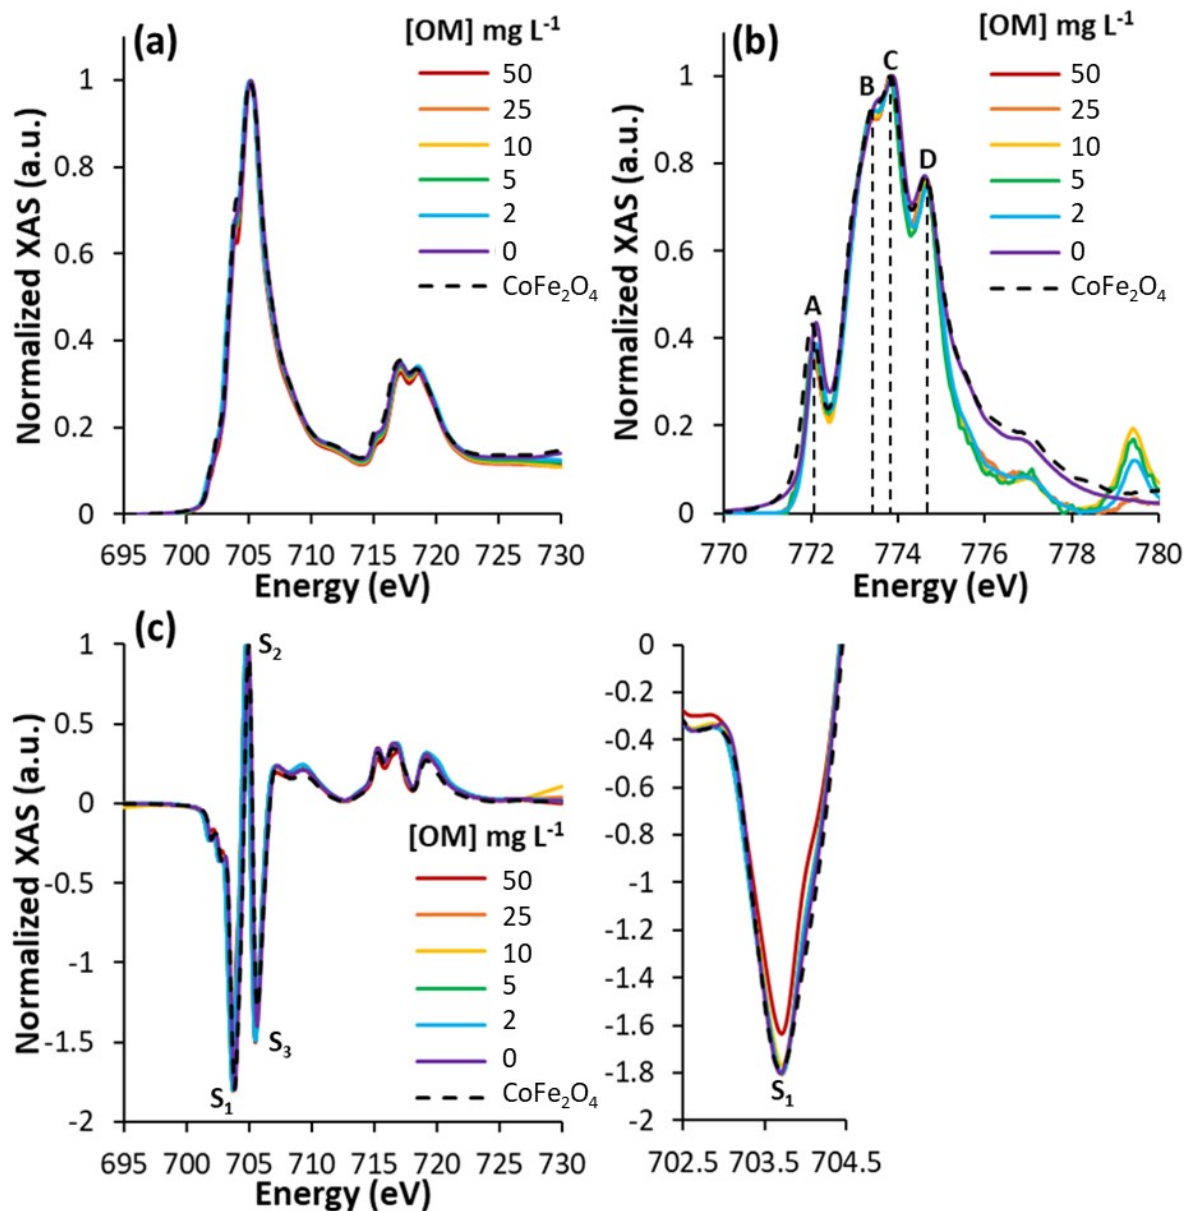

**Fig. S11** Normalized XAS (a) and XMCD (c) at the Fe  $L_{2,3}$ -edge and normalized XAS (b) at the Co  $L_3$ -edge of stoichiometric magnetite (R0.5) with  $[\text{Co}]_{\text{tot}} = 0.04 \text{ mM}$  for different OM concentrations (from 0 to 50  $\text{mg L}^{-1}$ ). XAS signals of Fe are normalized by dividing the raw signals by the edge jump of XAS, and XMCD signals are normalized to the  $\text{Fe}^{3+}_{(\text{Td})}$  peak (positive one). XAS of Co signals are normalized by dividing the raw signal by the maximum XAS peak, and are also normalized to the C peak. The apparent peak around 779.3 eV on (b) is very likely due to contamination by the substrate (barium).

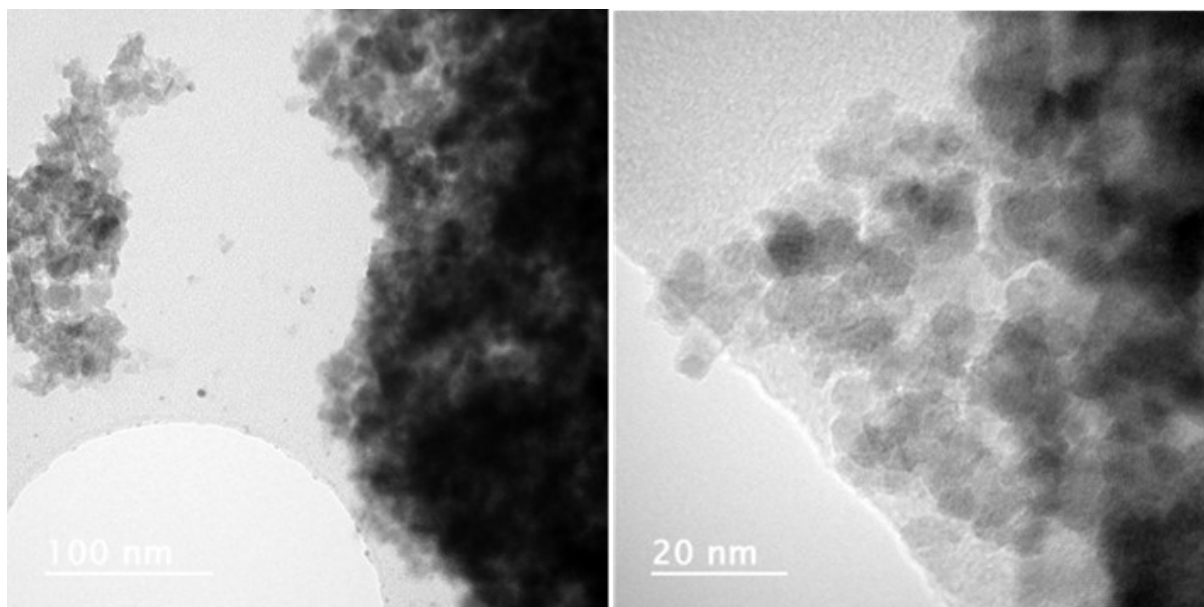

**Fig. S12** TEM images of magnetite R0.1 with  $[Co]_{tot} = 3 \text{ mM}$ , in aerobic conditions. (Left) scale of 100 nm and (right) 20 nm.

## References

- 1 L. Fablet, F. Choueikani, M. Pédrot, M. Kerdiles, M. Pasturel and R. Marsac, Investigation of magnetite–Co interactions: from environmentally relevant trace Co levels to core–shell  $Fe_3O_4@Co(OH)_2$  nanoparticles with magnetic applications, *Environ. Sci.: Nano*, , DOI:10.1039/D3EN00379E.
- 2 M. H. Bradbury and B. Baeyens, Sorption modelling on illite. Part II: Actinide sorption and linear free energy relationships, *Geochimica et Cosmochimica Acta*, 2009, **73**, 1004–1013.
- 3 P. Jungcharoen, M. Pédrot, F. Choueikani, M. Pasturel, K. Hanna, F. Heberling, M. Tesfa and R. Marsac, Probing the effects of redox conditions and dissolved Fe 2+ on nanomagnetite stoichiometry by wet chemistry, XRD, XAS and XMCD, *Environ. Sci.: Nano*, 2021, **8**, 2098–2107.
